# Supplementary material
Source: publisher site journal article supplement (https://www.dovepress.com/article/486869)
Supplement: Supplementary file 1 [file get_supplementary_file.php]

**Supplementary material**

[Supplement 1: Cut-off values defining dose categories. 2](#_Toc190090070)

[Supplement 2: ATC-codes per condition 3](#_Toc190090071)

[Supplement 3: Models’ functional form 4](#_Toc190090072)

[Supplement 4: Lasagna plots 6](#_Toc190090073)

[Supplement 5: Start step per subgroup 11](#_Toc190090074)

[Supplement 6: First to last step matrices for atopic disease, cardiovascular diseases, mental health problems, and peptic ulcer & gastroesophageal reflux disease subgroups. 12](#_Toc190090075)

# Supplement 1: Cut-off values defining dose categories

| **Generic drug name** | **Inhaler type** | **Low daily dose (mcg)** | **Medium daily dose (mcg)** | **High daily dose (mcg)** |
| --- | --- | --- | --- | --- |
| Beclomethasone | Aerosol Dry powder Aerosol (extra fine) | < 600 < 600 < 300 | ≥ 600 - < 900 ≥ 600 - < 1200 ≥ 300 - < 600 | ≥ 900 ≥ 1200 ≥ 600 |
| Budesonide | Aerosol Dry powder | < 600 < 600 | ≥ 600 - < 1200 ≥ 600 - < 1200 | ≥ 1200 ≥ 1200 |
| Fluticasone | Aerosol Dry powder | < 375 < 350 | ≥ 375 - < 750 ≥ 350 - < 750 | ≥ 750 ≥ 750 |
| Ciclesonide | Aerosol | < 120 | ≥ 120 - < 400 | ≥ 400 |
| Beclomethasone/formoterol | Aerosol/ Dry powder | ≤ 200/12 | ≥ 300/12 - ≤ 500/30 | ≥ 600/18 |
| Budesonide/formoterol | Aerosol/ Dry powder | ≤ 400/24 | ≥ 480/13.5 - ≤ 1000/48 | ≥ 1200/36 |
| Fluticasone/salmeterol | Aerosol Dry powder | ≤ 300/150 ≤ 300/150 | ≥ 375/50 - ≤ 625/225 ≥ 400/50 - ≤ 600/300 | ≥ 750/75 ≥ 750/100 |
| Fluticasone/vilanterol | Dry powder | ≤ 92/22 | ≥ 184/22 - ≤ 184/44 | ≥ 368/44 |
| Budesonide/salmeterol | Dry powder | ≤ 240/40 | ≥ 480/40 | - |
| Fluticasone/formoterol | Aerosol | ≤ 250/20 | ≥ 375/15 - ≤ 500/20 | ≥ 750/30 |

Abbreviations: mcg, microgram. Note: For ICS/LABA, the ICS dosages are leading.

# Supplement 2: ATC-codes per condition

| Drugs used for… | ATC-codes |
| --- | --- |
| Arthritis | M01 or M02 |
| Atopic diseasesa | D07, D11AH, R01AC, R01AD, R06, S01GX |
| Cardiovascular disease | C01AA05, C01DA, C02, C03, C07, C08, C09 |
| Diabetes | A10 |
| Mental health problemsb | N05B, N05C, N06A, N06D |
| Peptic ulcer and GERD | A02B |
| Thyroid disease | H03 |
| Immunosuppressants | L01, L04, J05A |

Abbreviations: ATC-codes = Anatomic Therapeutic Chemical -codes, GERD = gastroesophageal reflux disease.

a Includes allergies, allergic rhinitis, allergic conjunctivitis, and dermatitis

b Includes depression and dementia

# Supplement 3: Models’ functional form

*The models’ functional form was determined by the following procedure. The inclusion of variables was based on expert knowledge and availability of data. Several variations of the model (e.g. with or without splines and interactions) were visually compared to the empirical data based on the proportions per treatment step for each month of follow-up. To guard against overfitting, we used a measure of fit (the proportions per treatment step for each month of follow-up) that does not have a one-to-one relation with the outcomes of interest (proportion of individuals switching, time until first switch, and number of switches) but is sufficiently indicative of population trajectories.*

*Evaluation methods commonly used in machine learning for predictive modelling, such as cross-validation might be recommended and should be explored.*

*Variable list*

Startyear – year at baseline, continuous

ns(startyear, df=4) – natural spine with 4 degrees of freedom

Startage – age at baseline, standardized, continuous

Sex – binary (0 = female, 1 = male)

Diabetes, cardiovascular disease, mental health problems, arthritis, thyroid disease, atopic disease, GERD, immunosuppressants – binary (0 = absent, 1 = present)

Startstep – factor variable of treatment step at baseline

l.[variable] – lagged variable; indicates that this information comes from the previous time point, eg. if you are predicting timepoint t, then l.step2 indicates whether the treatment step at timepoint t-1 equals step 2 or not.

steptimer – indicates how long someone has been in the current treatment step and starts recounting when they switch to another step; continuous, linear, 1 unit increase per month

step0, step2, step3, step4 – dummy variables indicating treatment step, step 1 is used as reference (thus if others are all 0, then step1 is implied); binary

*Natural course*

outcome ~ # time constant variables #

splines::ns(startyear, df=4) + startage +

startstep # coded as factor # +

sex + diabetes + cardiovascular disease + mental health problems + arthritis +

thyroid disease + atopic disease + GERD + immunosuppressants +

# time varying variables #

splines::ns(time,df=5) +

l.steptimer +

l.step2 + l.step2*l.steptimer +

l.step3 + l.step3*l.steptimer +

l.step4 + l.step4*l.steptimer +

l.step0 + l.step0*l.steptimer

# step 1 is reference category

*Counter factual scenario’s*

Condition = sex, diabetes, cardiovascular disease, mental health problems, arthritis, thyroid disease, atopic disease, GERD, immunosuppressants (one condition per model execution).

outcome ~ # time constant variables #

splines::ns(startyear, df=4) + startage +

startstep # coded as factor # +

sex + diabetes + cardiovascular disease + mental health problems + arthritis +

thyroid disease + atopic disease + GERD + immunosuppressants +

# time varying variables #

splines::ns(time,df=5) +

condition *

(l.steptimer +

l.step2 + l.step2*l.steptimer +

l.step3 + l.step3*l.steptimer +

l.step4 + l.step4*l.steptimer +

l.step0 + l.step0*l.steptimer )

# step 1 is reference category

# Supplement 4: Lasagna plots


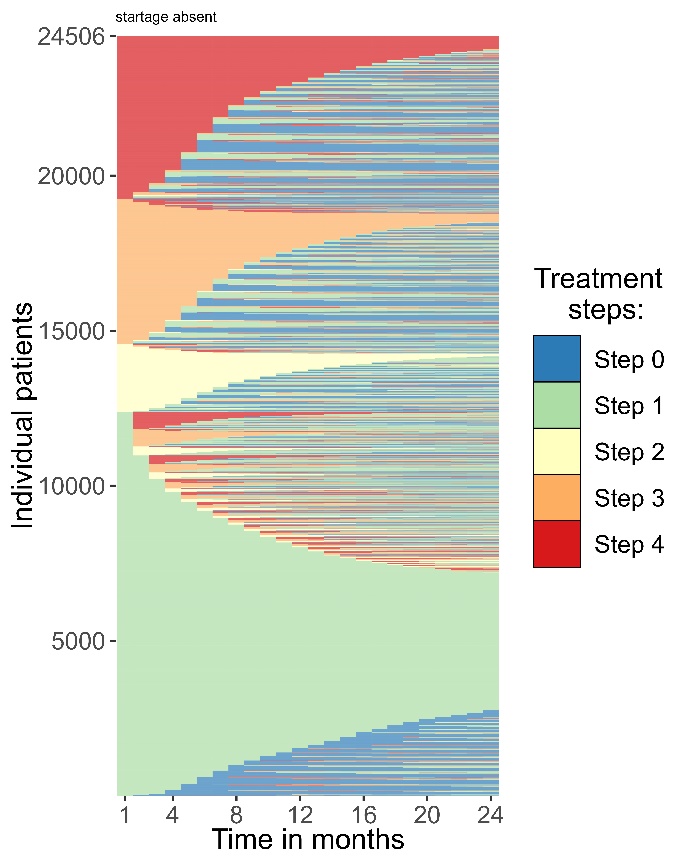

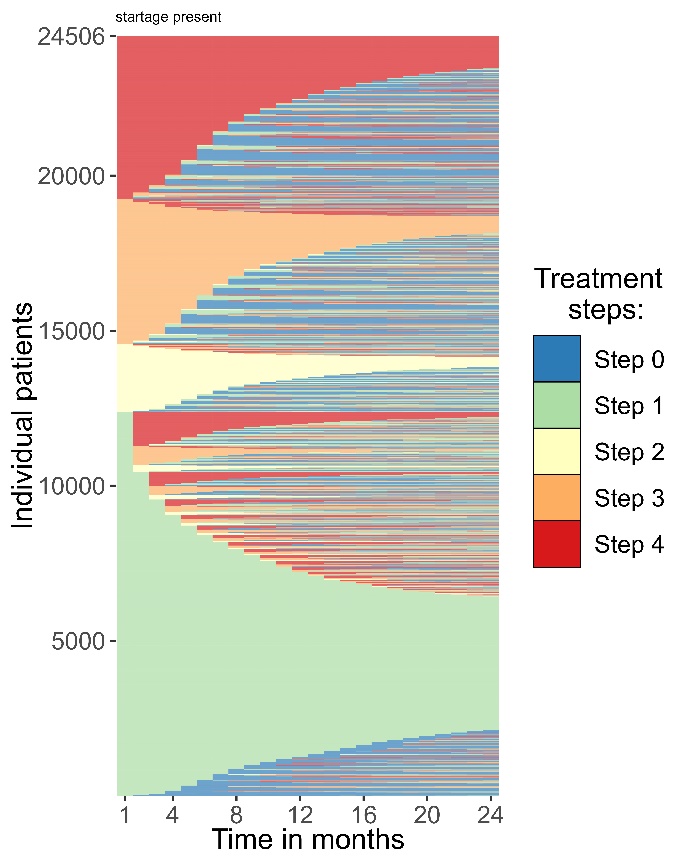
**16 years old at initiation 45 years old at initiation**


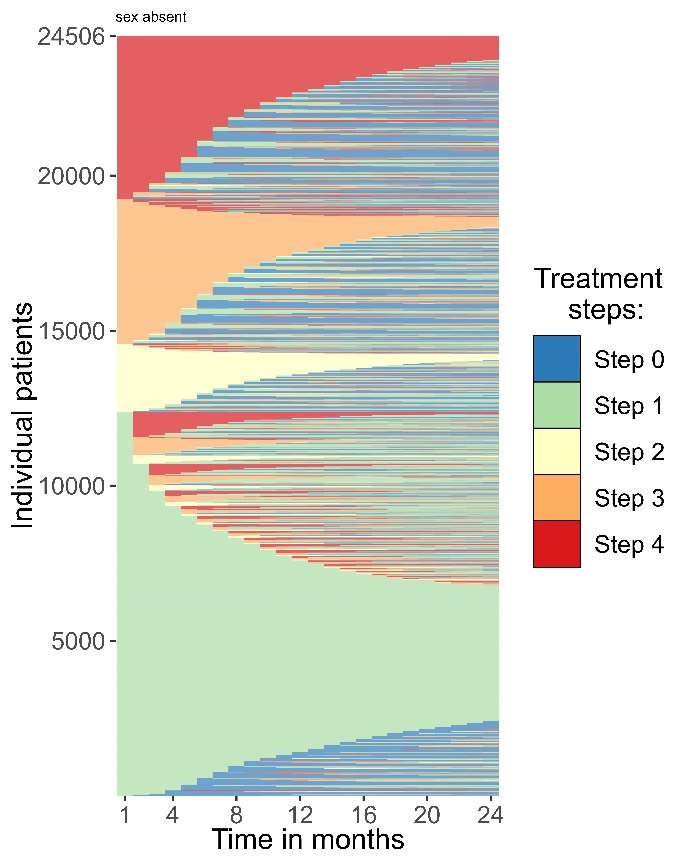

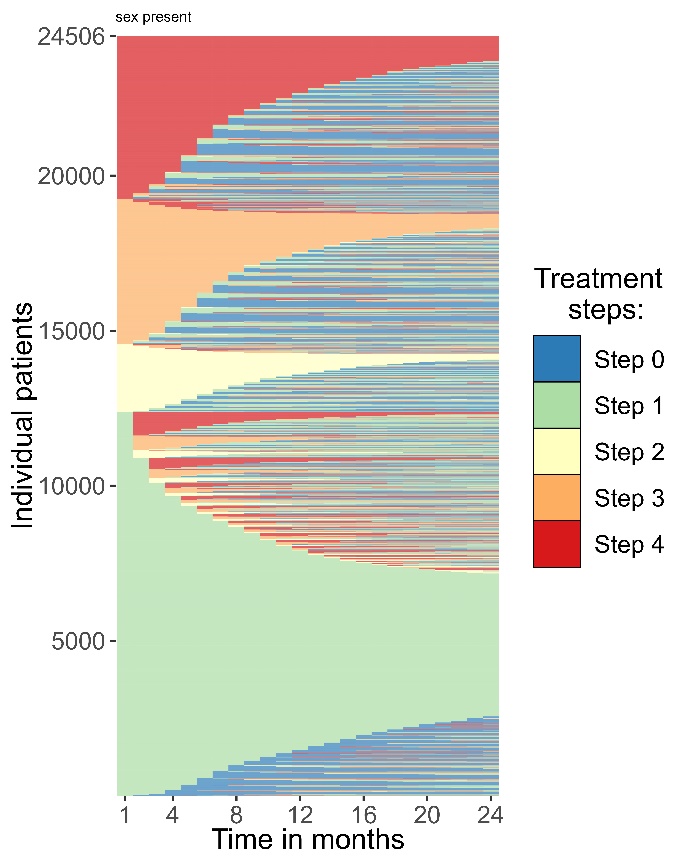
**Sex female Sex male**


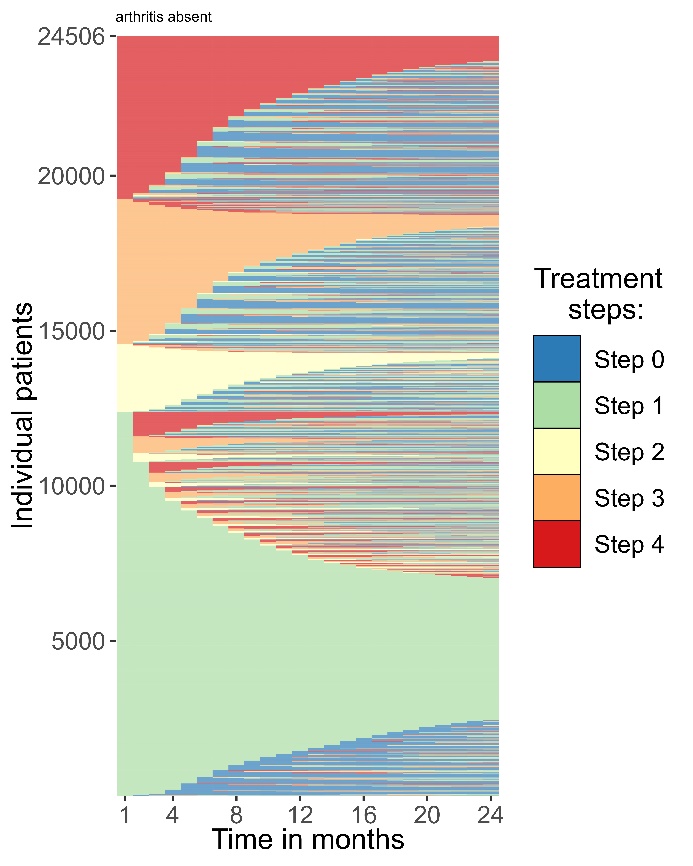

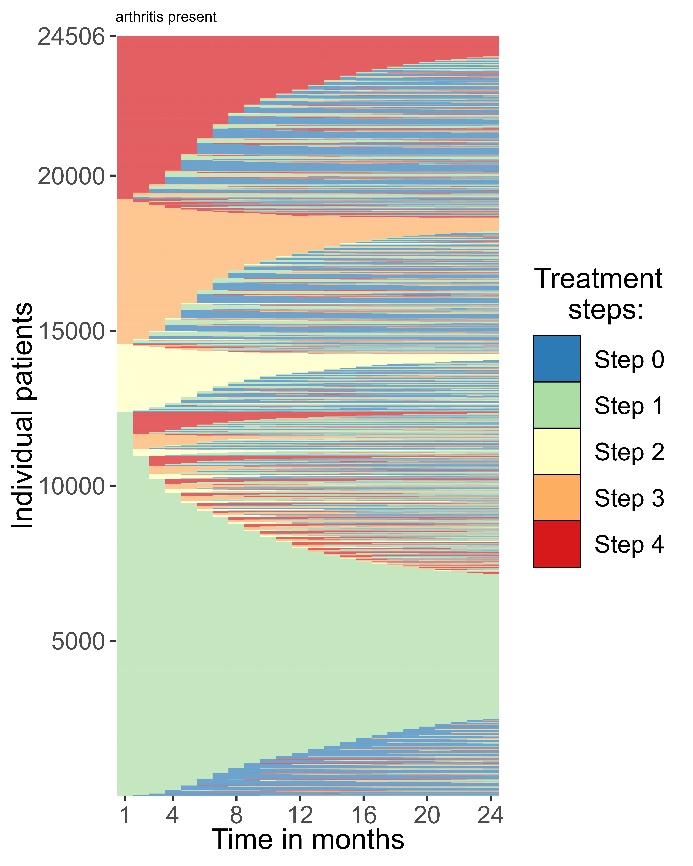
 **Arthritis absent Arthritis present**


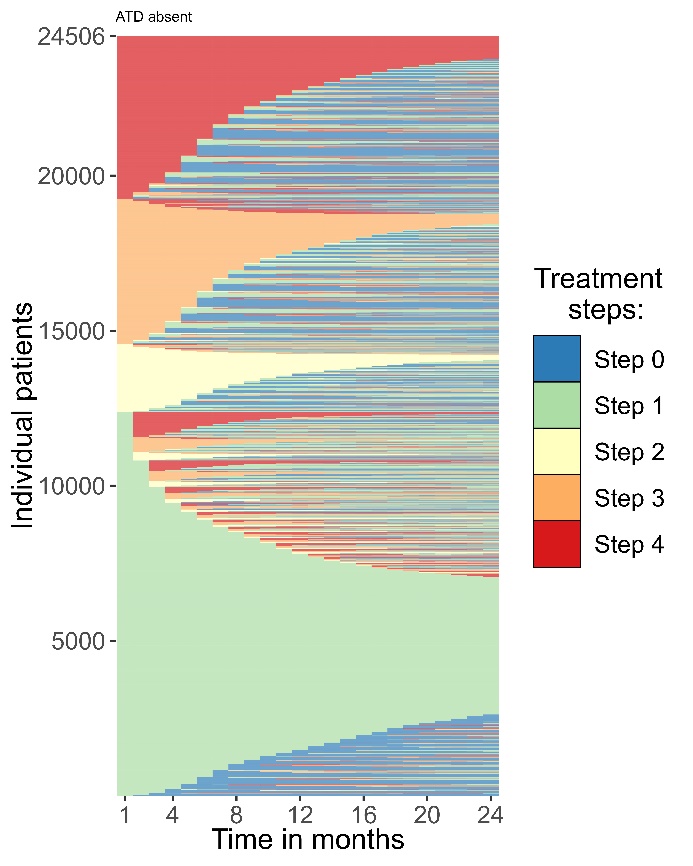

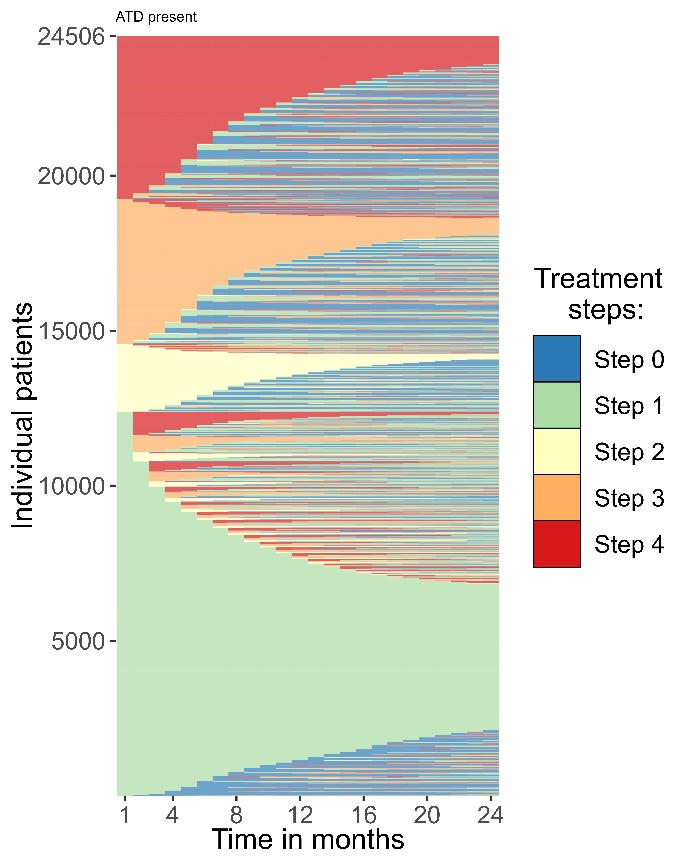
 **Atopic diseases absent Atopic diseases present**


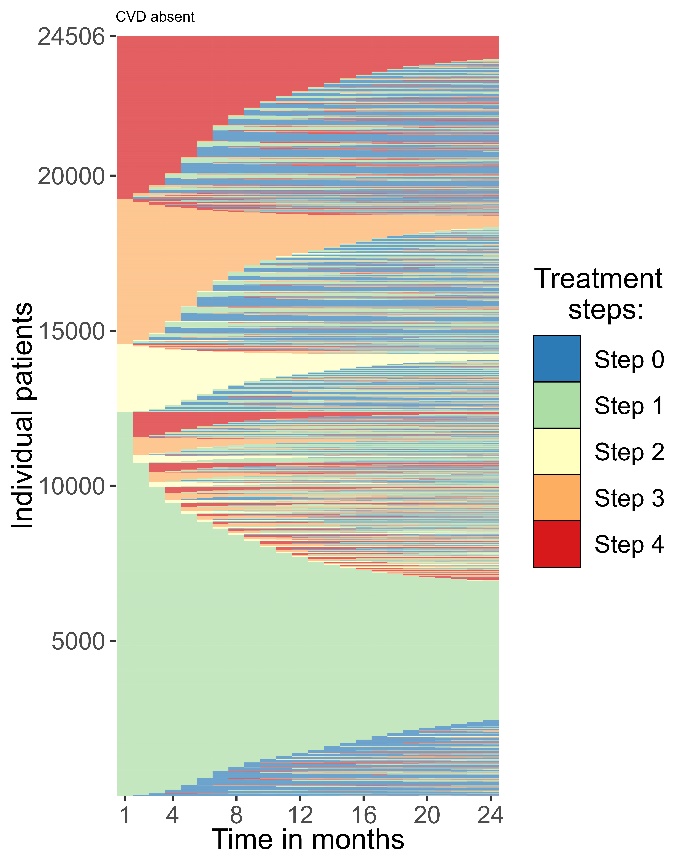

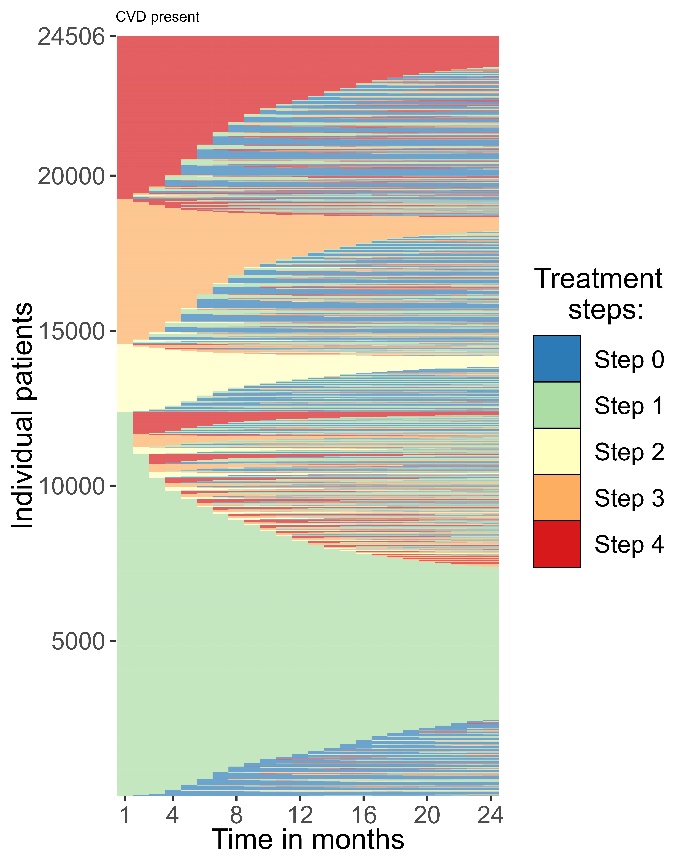
 **Cardiovascular diseases absent Cardiovascular diseases present**


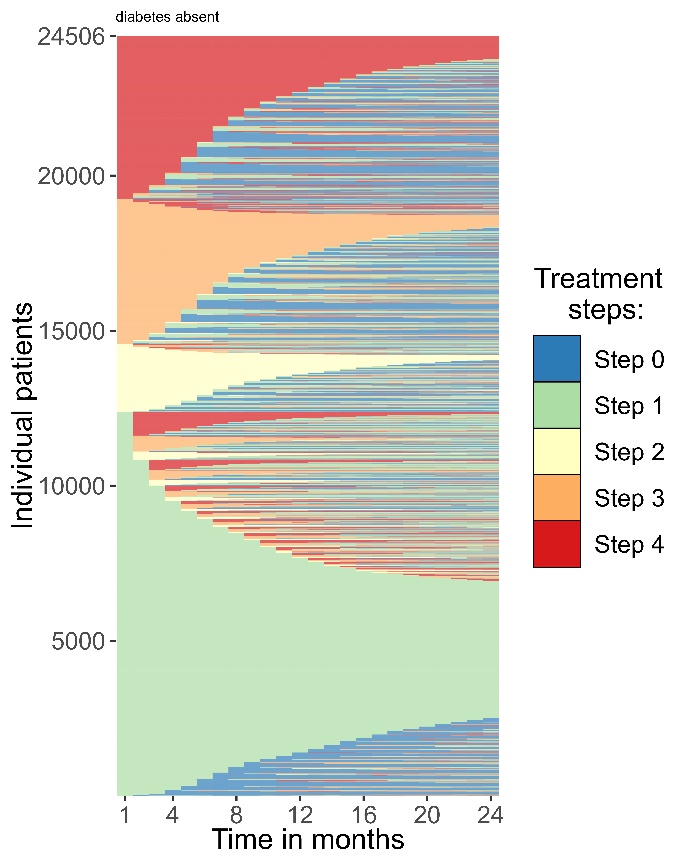

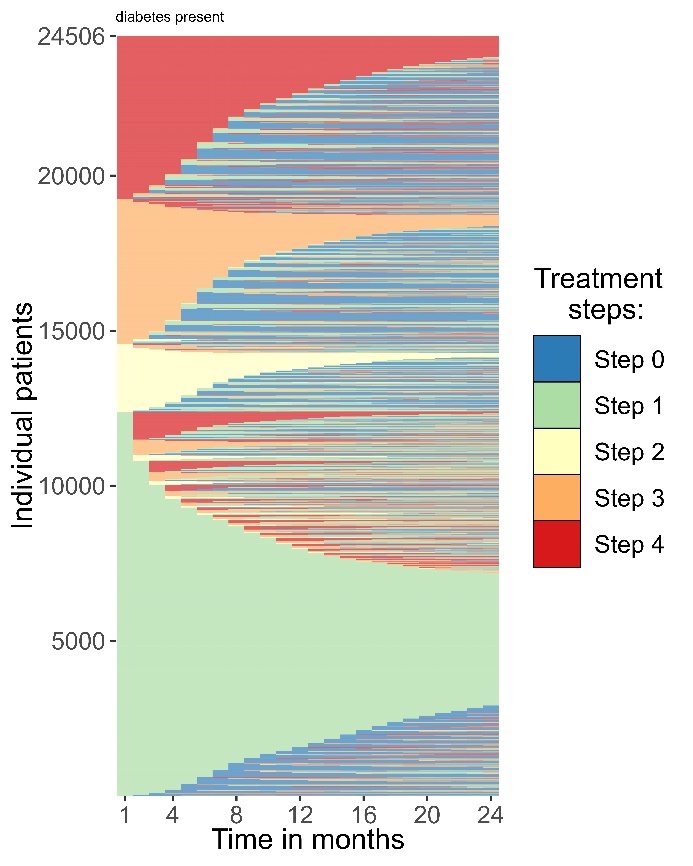
 **Diabetes absent Diabetes present**


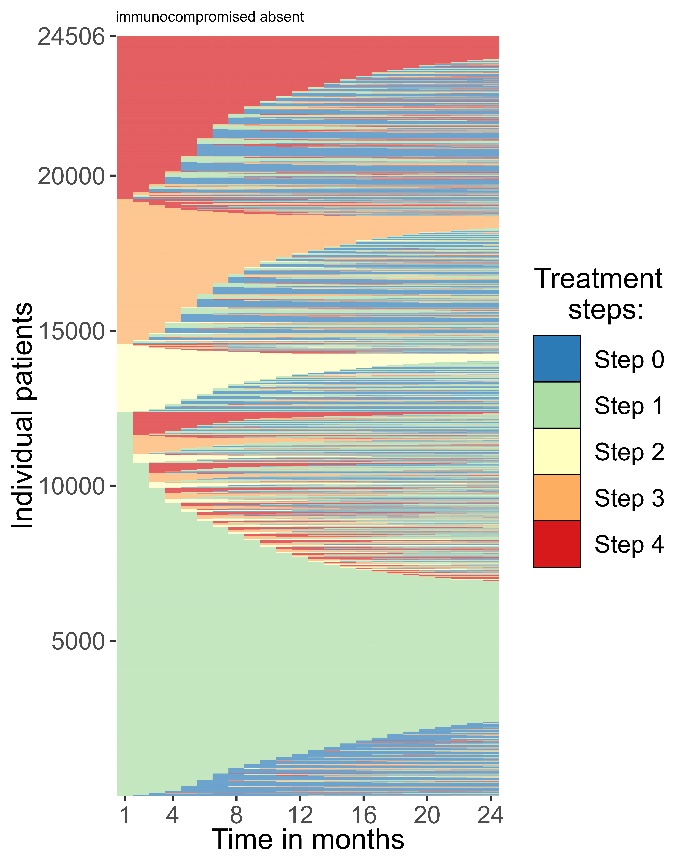

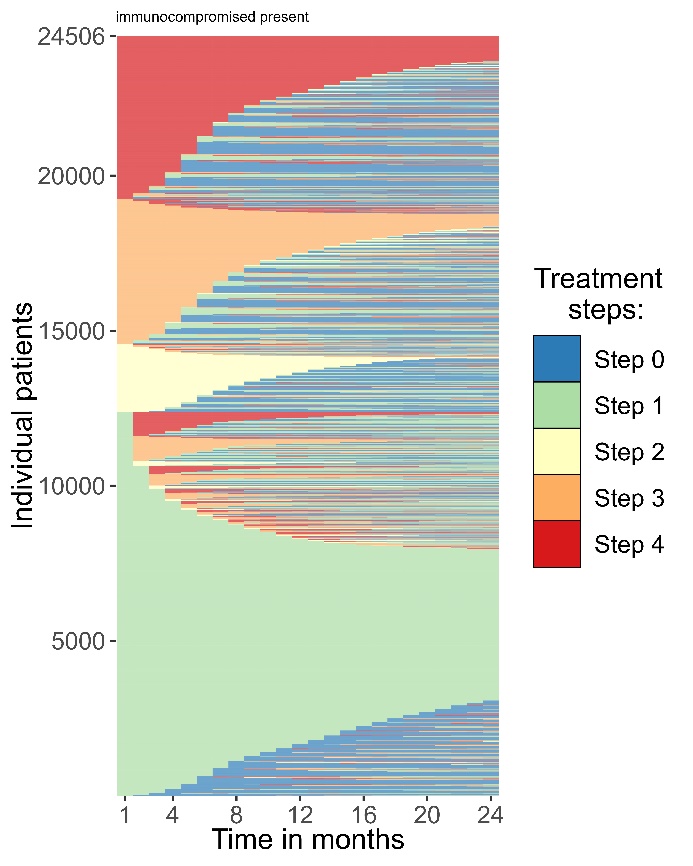
**Immunosuppressants absent Immunosuppressants present**


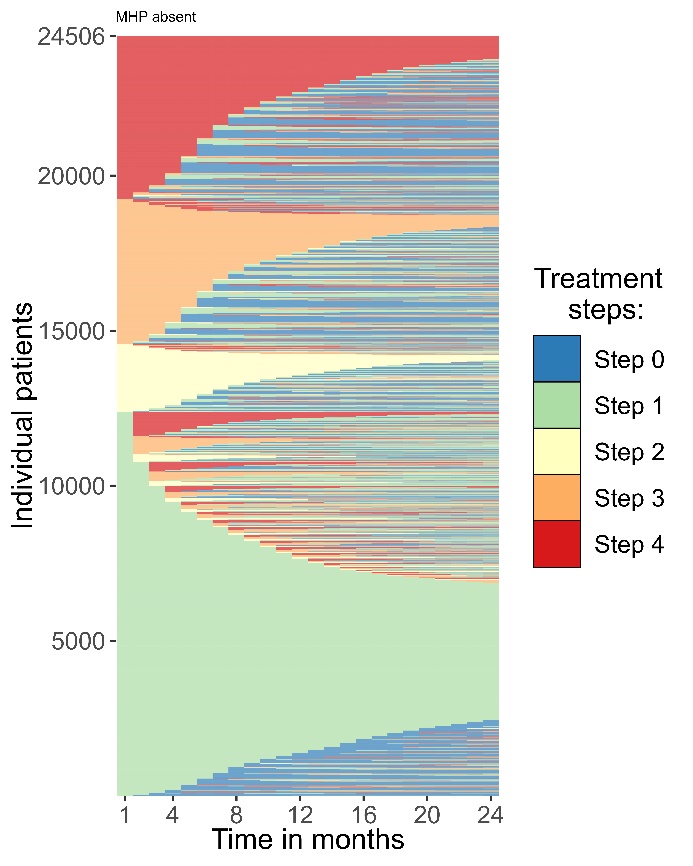

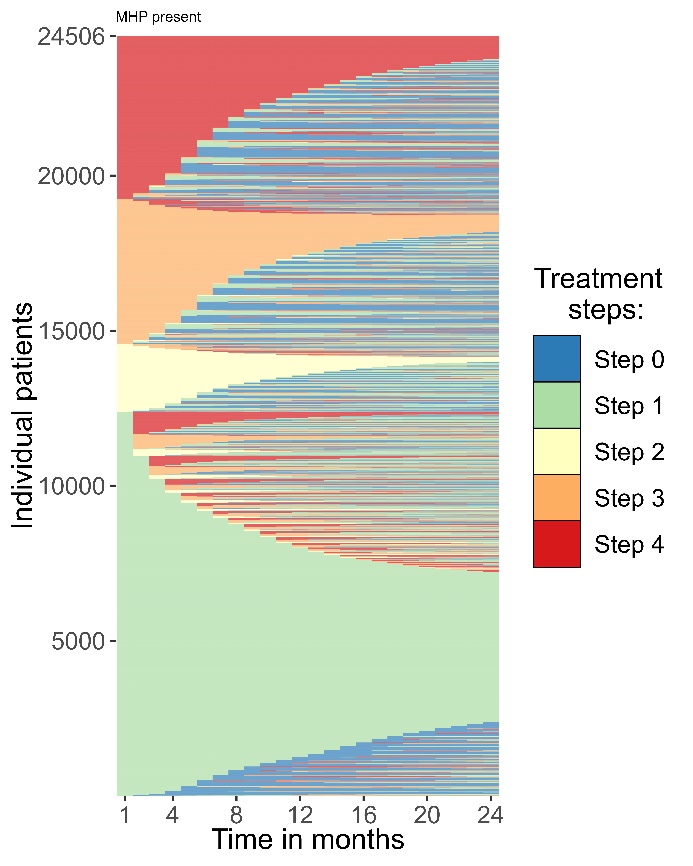
**Mental health problems absent Mental health problems present**


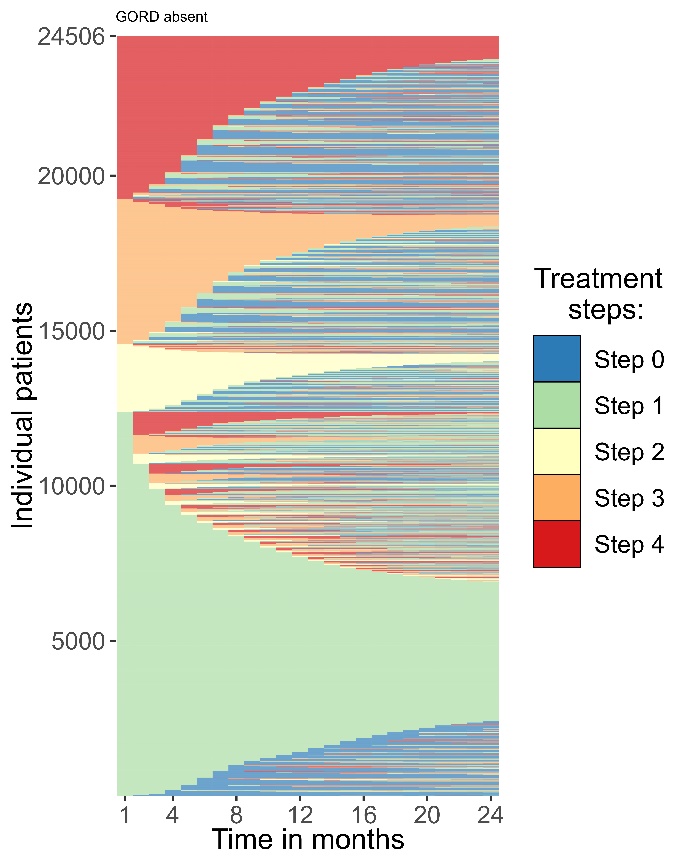

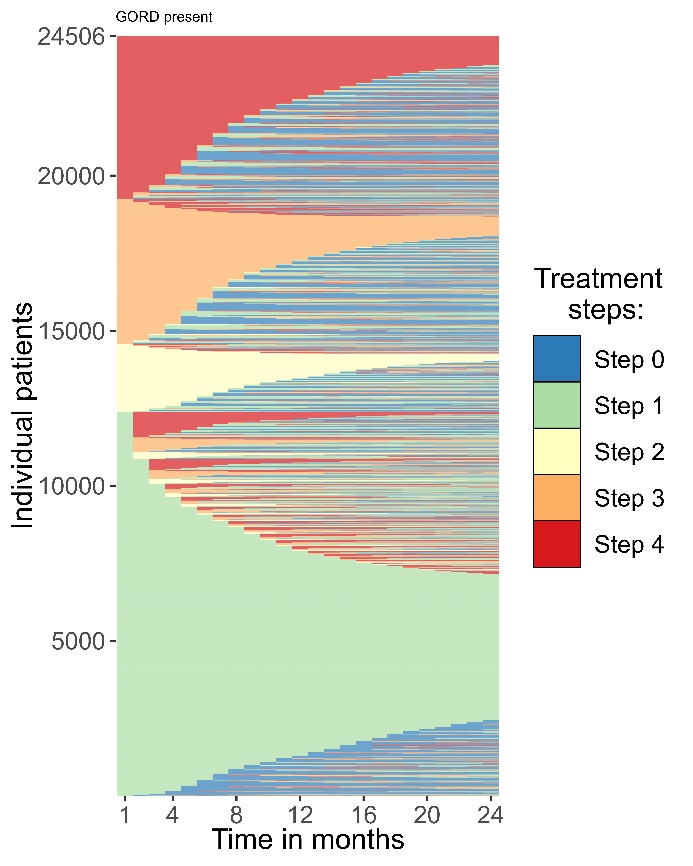
**Peptic ulcer & GERD absent Peptic ulcer & GERD present**


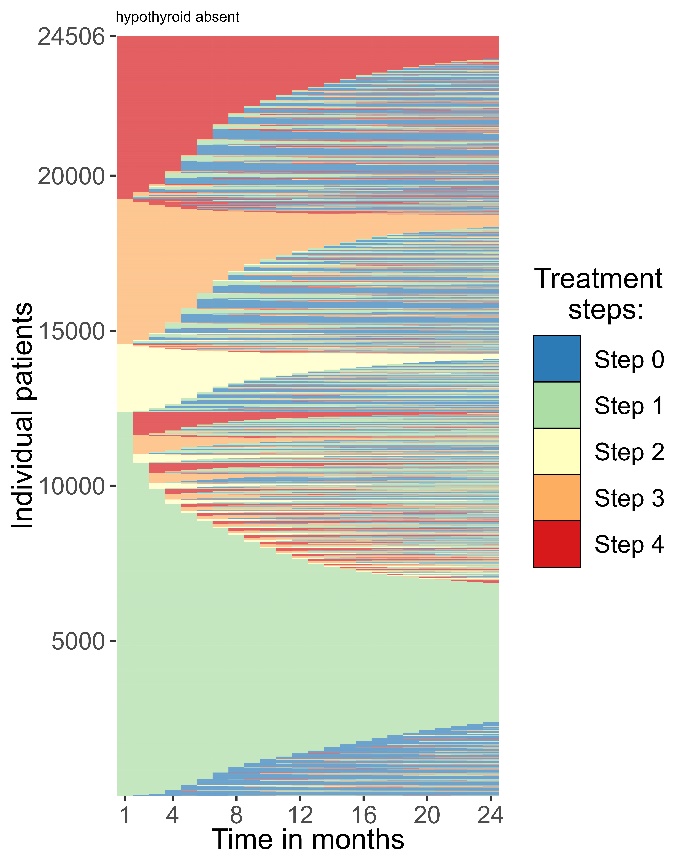

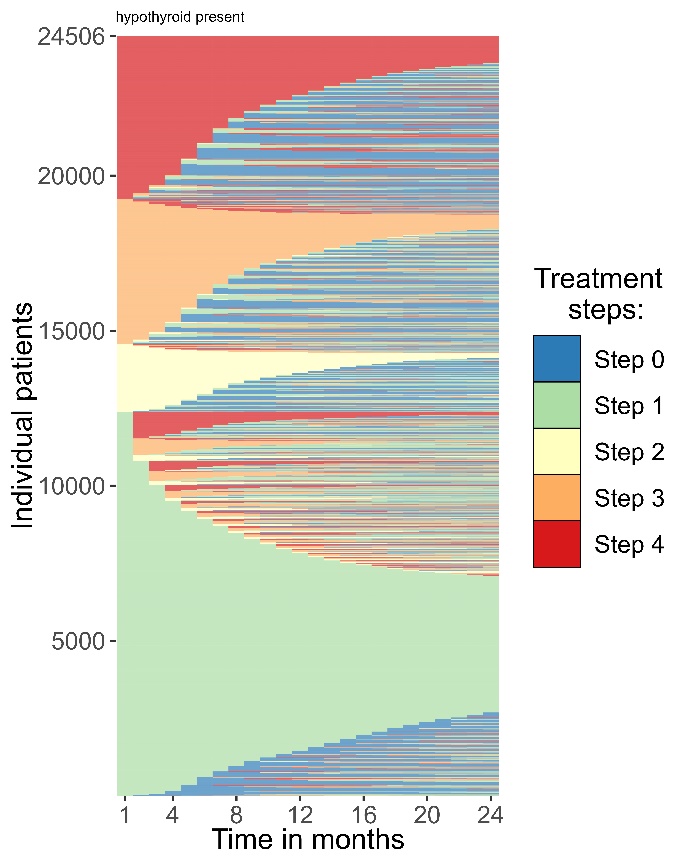
**Thyroid disease absent Thyroid disease present**

# Supplement 5: Start step per subgroup

| Altered condition | Mean step | Step 1  % | Step 2  % | Step 3  % | Step 4  % |
| --- | --- | --- | --- | --- | --- |
| Age  Below average  Above average | 2.0  2.2 | 55.0  46.9 | 9.7  8.3 | 17.6  20.4 | 17.8  24.4 |
| Sex  Female  Male | 2.1  2.2 | 50.9  49.9 | 9.4  8.0 | 19.6  18.2 | 20.1  23.9 |
| Arthritis  Absent  Present | 2.1  2.1 | 50.5  51.0 | 9.0  8.2 | 19.2  18.3 | 21.3  22.5 |
| Atopic diseases  Absent  Present | 2.1  2.1 | 50.4  50.8 | 8.8  9.4 | 18.9  20.0 | 21.9  19.9 |
| Cardiovascular diseases  Absent  Present | 2.1  2.3 | 50.9  45.4 | 9.0  7.3 | 19.1  20.2 | 21.0  27.2 |
| Diabetes  Absent  Present | 2.1  2.1 | 50.5  52.7 | 9.0  5.0 | 19.2  18.3 | 21.4  24.0 |
| Immunosuppressants  Absent  Present | 2.1  2.1 | 50.5  52.3 | 9.0  4.6 | 19.1  19.0 | 21.4  24.1 |
| Mental health problems  Absent  Present | 2.1  2.1 | 50.5  50.6 | 9.1  7.9 | 19.2  18.5 | 21.2  22.9 |
| Peptic ulcer & GERD  Absent  Present | 2.1  2.2 | 50.7  48.8 | 9.1  7.3 | 19.2  18.8 | 21.0  25.1 |
| Thyroid disease  Absent  Present | 2.1  2.2 | 50.5  49.8 | 8.9  9.0 | 19.2  16.3 | 21.3  24.9 |

Abbreviations: CI = Confidence interval, GERD = gastroesophageal reflux disease.

# Supplement 6: First to last step matrices for atopic diseases, cardiovascular diseases, mental health problems, and peptic ulcer & gastroesophageal reflux diseases

|  | Without atopic diseases | | | |  | With atopic diseases | | | |
| --- | --- | --- | --- | --- | --- | --- | --- | --- | --- |
| *From: To:* | *Step 1* | *Step 2* | *Step 3* | *Step 4* |  | *Step 1* | *Step 2* | *Step 3* | *Step 4* |
| *step0* | 23.5 | 40.0 | 46.5 | 46.8 |  | 19.5 | 39.4 | 39.9 | 40.2 |
| *step1* | 59.7 | 30.5 | 25.2 | 21.7 |  | 61.2 | 29.3 | 26.0 | 22.8 |
| *step2* | 3.2 | 17.0 | 2.4 | 0.9 |  | 3.9 | 17.5 | 3.0 | 1.2 |
| *step3* | 5.2 | 5.8 | 18.5 | 3.1 |  | 6.1 | 6.5 | 22.7 | 3.7 |
| *step4* | 8.3 | 6.6 | 7.3 | 27.5 |  | 9.3 | 7.2 | 8.5 | 32.1 |
|  |  |  |  |  |  |  |  |  |  |
|  | **Without cardiovascular diseases** | | | |  | **With cardiovascular diseases** | | | |
| *From: To:* | *Step 1* | *Step 2* | *Step 3* | *Step 4* |  | *Step 1* | *Step 2* | *Step 3* | *Step 4* |
| *step0* | 22.8 | 40.1 | 44.9 | 45.9 |  | 21.2 | 36.3 | 45.1 | 41.7 |
| *step1* | 60.1 | 30.4 | 25.6 | 22.1 |  | 59.8 | 25.3 | 22.5 | 20.4 |
| *step2* | 3.4 | 16.7 | 2.6 | 1.1 |  | 3.4 | 24.9 | 2.6 | 0.8 |
| *step3* | 5.4 | 6.1 | 19.4 | 3.2 |  | 5.8 | 5.8 | 21.3 | 3.4 |
| *step4* | 8.4 | 6.7 | 7.5 | 27.9 |  | 9.8 | 7.6 | 8.6 | 33.7 |
|  |  |  |  |  |  |  |  |  |  |
|  | **Without mental health problems** | | | |  | **With mental health problems** | | | |
| *From: To:* | *Step 1* | *Step 2* | *Step 3* | *Step 4* |  | *Step 1* | *Step 2* | *Step 3* | *Step 4* |
| *step0* | 22.9 | 40.2 | 45.3 | 45.9 |  | 21.3 | 37.9 | 42.8 | 43.4 |
| *step1* | 59.6 | 29.7 | 25.3 | 21.4 |  | 62.3 | 33.1 | 25.8 | 24.4 |
| *step2* | 3.5 | 17.6 | 2.7 | 1.1 |  | 2.7 | 14.6 | 2.0 | 0.8 |
| *step3* | 5.4 | 5.8 | 19.1 | 3.2 |  | 5.6 | 6.9 | 22.0 | 3.4 |
| *step4* | 8.6 | 6.7 | 7.6 | 28.5 |  | 8.2 | 7.6 | 7.4 | 28.1 |
|  |  |  |  |  |  |  |  |  |  |
|  | **Without peptic ulcer & GERD** | | | |  | **With peptic ulcer & GERD** | | | |
| *From: To:* | *Step 1* | *Step 2* | *Step 3* | *Step 4* |  | *Step 1* | *Step 2* | *Step 3* | *Step 4* |
| *step0* | 22.8 | 40.2 | 45.3 | 45.9 |  | 21.0 | 36.7 | 41.3 | 41.8 |
| *step1* | 60.0 | 30.1 | 25.6 | 22.0 |  | 60.2 | 31 | 23.8 | 20.9 |
| *step2* | 3.4 | 17.1 | 2.6 | 1.0 |  | 2.8 | 17.1 | 2.1 | 0.8 |
| *step3* | 5.4 | 5.9 | 19.1 | 3.2 |  | 5.7 | 6.6 | 23.8 | 3.2 |
| *step4* | 8.3 | 6.6 | 7.4 | 27.9 |  | 10.2 | 8.6 | 9.1 | 33.3 | |

Abbreviations: GERD = gastroesophageal reflux disease.
